# Supplementary material for: Whole-Genome Sequencing of the World’s Oldest People
Source: PLoS One. 2014 Nov 12;9(11):e112430. doi: 10.1371/journal.pone.0112430 (PMC4229186; doi:10.1371/journal.pone.0112430)
Supplement: Table S4 — Gene-based Fisher’s Exact test for recessive model of rare protein-altering variants in supercentenarians and controls. (XLSX) [file pone.0112430.s006.xlsx]

## Sheet: 2 or more
Table S4. Gene-based Fisher's Exact test for recessive model of rare protein-altering variants in supercentenarians and controls.
Gene	SC 2+ Carriers (n=13)	PGP 2+ Carriers (n=34)	Uncorrected P-value Fisher's
TNXB	5	3	0.0277421
OTOF	3	1	0.0585261
FREM2	2	0	0.0721554
VWA5B1	2	0	0.0721554
FAM208B	2	0	0.0721554
MYO19	2	0	0.0721554
LPA	2	0	0.0721554
ZNF534	2	0	0.0721554
KLLN	2	0	0.0721554
PLB1	2	0	0.0721554
CYSLTR2	2	0	0.0721554
FHOD1	2	0	0.0721554
RNASE13	2	0	0.0721554
ICOSLG	2	0	0.0721554
SGTB	2	0	0.0721554
TRIM64C	0	8	0.0854803
NEB	3	2	0.121284
WDR52	3	2	0.121284
ZNF43	0	6	0.166843
RANBP2	0	6	0.166843
RPTN	0	6	0.166843
CCDC144A	0	6	0.166843
FLG2	2	1	0.18119
PKD1L1	2	1	0.18119
DNAH5	2	1	0.18119
PKHD1	2	1	0.18119
HSPG2	2	1	0.18119
STARD9	2	1	0.18119
FBRSL1	2	1	0.18119
THUMPD1	2	1	0.18119
SCN9A	2	1	0.18119
CNTNAP4	2	1	0.18119
PARP1	2	1	0.18119
SPDEF	2	1	0.18119
MUC17	3	16	0.189485
C4A	4	4	0.190928
RP1L1	1	9	0.243664
HLA-B	1	9	0.243664
FAM35A	1	9	0.243664
HLA-A	5	7	0.268714
AKAP13	1	0	0.276596
CLTCL1	1	0	0.276596
SRRM2	1	0	0.276596
CDH23	1	0	0.276596
ZFP106	1	0	0.276596
DOCK6	1	0	0.276596
KIAA1109	1	0	0.276596
KIAA1217	1	0	0.276596
CC2D1A	1	0	0.276596
SH3TC1	1	0	0.276596
DMXL2	1	0	0.276596
RIN3	1	0	0.276596
GSE1	1	0	0.276596
IVL	1	0	0.276596
MLL4	1	0	0.276596
BAI2	1	0	0.276596
NCOR2	1	0	0.276596
ARHGEF18	1	0	0.276596
COL4A3	1	0	0.276596
ZFHX4	1	0	0.276596
UNC79	1	0	0.276596
TNS1	1	0	0.276596
PASK	1	0	0.276596
SPEG	1	0	0.276596
ABCA2	1	0	0.276596
DYNC2H1	1	0	0.276596
NWD1	1	0	0.276596
RBBP8NL	1	0	0.276596
BCL9L	1	0	0.276596
PSD	1	0	0.276596
TRMT2A	1	0	0.276596
PDZD2	1	0	0.276596
SDK1	1	0	0.276596
SETD1A	1	0	0.276596
CCDC88B	1	0	0.276596
COL14A1	1	0	0.276596
ANKRD11	1	0	0.276596
HR	1	0	0.276596
ARHGEF17	1	0	0.276596
BAZ2A	1	0	0.276596
PCDHGA8	1	0	0.276596
ZNF493	1	0	0.276596
CCDC136	1	0	0.276596
GGA1	1	0	0.276596
C14orf159	1	0	0.276596
KIAA2026	1	0	0.276596
PCDHGA2	1	0	0.276596
RAD54L	1	0	0.276596
LRRC66	1	0	0.276596
DSG4	1	0	0.276596
GRIN3B	1	0	0.276596
CEP290	1	0	0.276596
FOCAD	1	0	0.276596
JAK2	1	0	0.276596
ROBO3	1	0	0.276596
HDAC10	1	0	0.276596
CENPF	1	0	0.276596
KRTAP4-5	1	0	0.276596
PTCHD3	1	0	0.276596
NCOA7	1	0	0.276596
ADAM15	1	0	0.276596
C2orf16	1	0	0.276596
MARCH10	1	0	0.276596
XYLT1	1	0	0.276596
AP3B1	1	0	0.276596
GEMIN4	1	0	0.276596
TSHZ1	1	0	0.276596
ATF7IP	1	0	0.276596
LRRC16A	1	0	0.276596
ZNF518B	1	0	0.276596
ZNF92	1	0	0.276596
PPP6R1	1	0	0.276596
DOPEY2	1	0	0.276596
ZNF226	1	0	0.276596
ANKRD26	1	0	0.276596
UNC5B	1	0	0.276596
NLRP9	1	0	0.276596
PTPRH	1	0	0.276596
SIDT1	1	0	0.276596
LILRA2	1	0	0.276596
CASZ1	1	0	0.276596
C17orf77	1	0	0.276596
DUSP16	1	0	0.276596
RALGPS1	1	0	0.276596
NSUN5	1	0	0.276596
ATP13A3	1	0	0.276596
SPAG16	1	0	0.276596
NLRC5	1	0	0.276596
MTMR9	1	0	0.276596
MND1	1	0	0.276596
ZNF233	1	0	0.276596
ZNF676	1	0	0.276596
C15orf27	1	0	0.276596
TBC1D17	1	0	0.276596
SOS1	1	0	0.276596
FIZ1	1	0	0.276596
MEI1	1	0	0.276596
TNIP3	1	0	0.276596
CLCNKB	1	0	0.276596
ZNF354A	1	0	0.276596
SPHK2	1	0	0.276596
GBP6	1	0	0.276596
MYEOV2	1	0	0.276596
SORCS2	1	0	0.276596
C19orf71	1	0	0.276596
AEN	1	0	0.276596
ATAD3A	1	0	0.276596
ZEB1	1	0	0.276596
PAQR6	1	0	0.276596
GBA	1	0	0.276596
MAGI1	1	0	0.276596
CAMSAP3	1	0	0.276596
CYP1A1	1	0	0.276596
HAP1	1	0	0.276596
PKN3	1	0	0.276596
INTU	1	0	0.276596
CDC42EP4	1	0	0.276596
IL21R	1	0	0.276596
VNN1	1	0	0.276596
CIZ1	1	0	0.276596
KRT77	1	0	0.276596
FAM81B	1	0	0.276596
MAN2B2	1	0	0.276596
ART5	1	0	0.276596
MAPKAP1	1	0	0.276596
WDR87	1	0	0.276596
CACNA1G	1	0	0.276596
SETBP1	1	0	0.276596
UNC13C	1	0	0.276596
GPR20	1	0	0.276596
RBM28	1	0	0.276596
ZNF423	1	0	0.276596
MLH3	1	0	0.276596
ARMC2	1	0	0.276596
MFSD6L	1	0	0.276596
CNTNAP5	1	0	0.276596
ACSL3	1	0	0.276596
ANKRD13A	1	0	0.276596
PCDHB12	1	0	0.276596
KAT6B	1	0	0.276596
FCHSD1	1	0	0.276596
CCER1	1	0	0.276596
TMEM74	1	0	0.276596
TBC1D3C	1	0	0.276596
DCLK2	1	0	0.276596
STAU1	1	0	0.276596
FZD6	1	0	0.276596
PALM2	1	0	0.276596
TMPO	1	0	0.276596
ZGPAT	1	0	0.276596
RNASEL	1	0	0.276596
PCDHGB7	1	0	0.276596
FSCN3	1	0	0.276596
C10orf68	1	0	0.276596
RAB3GAP2	1	0	0.276596
LRP8	1	0	0.276596
PRDX5	1	0	0.276596
PREP	1	0	0.276596
SLC9A1	1	0	0.276596
MTR	1	0	0.276596
DNAAF1	1	0	0.276596
MPHOSPH10	1	0	0.276596
VEZT	1	0	0.276596
ZNF638	1	0	0.276596
PEAK1	1	0	0.276596
C16orf11	1	0	0.276596
OPN4	1	0	0.276596
ZNF823	1	0	0.276596
SLC26A1	1	0	0.276596
ATP1A3	1	0	0.276596
KIAA1211L	1	0	0.276596
ZNF227	1	0	0.276596
C12orf70	1	0	0.276596
BNC2	1	0	0.276596
CYP11B1	1	0	0.276596
ZNF608	1	0	0.276596
ECI1	1	0	0.276596
OR2L2	1	0	0.276596
LOC100130451	1	0	0.276596
OR9I1	1	0	0.276596
ALDH16A1	1	0	0.276596
MUL1	1	0	0.276596
KIR2DL3	1	0	0.276596
VWDE	1	0	0.276596
ZNF160	1	0	0.276596
ZFP42	1	0	0.276596
ZER1	1	0	0.276596
CCDC159	1	0	0.276596
CTR9	1	0	0.276596
FEN1	1	0	0.276596
TAS2R8	1	0	0.276596
NEK10	1	0	0.276596
IMPG1	1	0	0.276596
RPP38	1	0	0.276596
ZNF577	1	0	0.276596
HHLA1	1	0	0.276596
MTG1	1	0	0.276596
ACSM3	1	0	0.276596
SCN3A	1	0	0.276596
APOLD1	1	0	0.276596
CLIP1	1	0	0.276596
CHSY3	1	0	0.276596
TEX29	1	0	0.276596
AMH	1	0	0.276596
AMPD3	1	0	0.276596
CRELD2	1	0	0.276596
FAM53A	1	0	0.276596
MYT1	1	0	0.276596
L1TD1	1	0	0.276596
FANCG	1	0	0.276596
TCTN3	1	0	0.276596
MROH6	1	0	0.276596
DDX18	1	0	0.276596
TAF1C	1	0	0.276596
CCDC93	1	0	0.276596
CNTN5	1	0	0.276596
HCFC1R1	1	0	0.276596
MON2	1	0	0.276596
TBXAS1	1	0	0.276596
LRRN2	1	0	0.276596
SNX7	1	0	0.276596
LARS	1	0	0.276596
L3MBTL2	1	0	0.276596
TTC5	1	0	0.276596
NDUFS2	1	0	0.276596
C17orf64	1	0	0.276596
LOC283710	1	0	0.276596
CFHR1	1	0	0.276596
DENND6A	1	0	0.276596
TUBAL3	1	0	0.276596
ZMYM1	1	0	0.276596
CYP2C18	1	0	0.276596
ADD3	1	0	0.276596
COL9A2	1	0	0.276596
CCDC79	1	0	0.276596
FSCN2	1	0	0.276596
CBR3	1	0	0.276596
FLI1	1	0	0.276596
GP5	1	0	0.276596
OR2W3	1	0	0.276596
ADAD2	1	0	0.276596
PSMC3IP	1	0	0.276596
ANLN	1	0	0.276596
SIRT7	1	0	0.276596
WDR53	1	0	0.276596
HEPACAM	1	0	0.276596
GORASP2	1	0	0.276596
HOXC11	1	0	0.276596
CNOT1	1	0	0.276596
EIF2C4	1	0	0.276596
POGLUT1	1	0	0.276596
CDC7	1	0	0.276596
BLOC1S6	1	0	0.276596
DVL1	1	0	0.276596
C16orf46	1	0	0.276596
KDM4B	1	0	0.276596
STK35	1	0	0.276596
GDF3	1	0	0.276596
LOC649330	1	0	0.276596
MEN1	1	0	0.276596
RSPH10B2	1	0	0.276596
UBIAD1	1	0	0.276596
TPRA1	1	0	0.276596
SIRT4	1	0	0.276596
KIR3DL1	1	0	0.276596
ZNF330	1	0	0.276596
MUC12	2	12	0.288483
HERC2	0	5	0.302684
USP6	0	5	0.302684
ANAPC1	0	5	0.302684
FAM71A	0	5	0.302684
PABPC3	2	2	0.303854
TET2	2	2	0.303854
DNAH11	2	2	0.303854
MKI67	2	2	0.303854
CDC27	2	2	0.303854
WWC1	2	2	0.303854
HYDIN	10	20	0.321395
MUC22	3	4	0.3769
PDE4DIP	3	4	0.3769
TPX2	3	4	0.3769
TLN2	1	8	0.409787
HLA-DPA1	1	8	0.409787
MUC6	1	7	0.413327
AHNAK2	4	7	0.466969
LILRB2	1	1	0.481036
FBN3	1	1	0.481036
RYR3	1	1	0.481036
PKHD1L1	1	1	0.481036
DMBT1	1	1	0.481036
DNAH2	1	1	0.481036
DST	1	1	0.481036
PRG4	1	1	0.481036
UTRN	1	1	0.481036
TPRX1	1	1	0.481036
CRYBG3	1	1	0.481036
TEKT4	1	1	0.481036
COL6A3	1	1	0.481036
ZNF778	1	1	0.481036
MYOM3	1	1	0.481036
RELN	1	1	0.481036
PDIA2	1	1	0.481036
HECW1	1	1	0.481036
RAB44	1	1	0.481036
COL17A1	1	1	0.481036
AXIN2	1	1	0.481036
LOXHD1	1	1	0.481036
KIAA0947	1	1	0.481036
C2orf71	1	1	0.481036
EXPH5	1	1	0.481036
DLG5	1	1	0.481036
WNK2	1	1	0.481036
PDCD6IP	1	1	0.481036
FREM3	1	1	0.481036
ZNF646	1	1	0.481036
CCDC40	1	1	0.481036
PCK2	1	1	0.481036
PRODH	1	1	0.481036
TIAM1	1	1	0.481036
PARP4	1	1	0.481036
MICAL2	1	1	0.481036
RTTN	1	1	0.481036
GREB1	1	1	0.481036
SPATA31A6	1	1	0.481036
IQCF3	1	1	0.481036
ALPK2	1	1	0.481036
HCN4	1	1	0.481036
ANKZF1	1	1	0.481036
MYH7	1	1	0.481036
KRTAP9-1	1	1	0.481036
LY75	1	1	0.481036
PLEKHN1	1	1	0.481036
OR2M5	1	1	0.481036
POM121	1	1	0.481036
OTOP3	1	1	0.481036
MICA	1	1	0.481036
IYD	1	1	0.481036
FAM65B	1	1	0.481036
PHC3	1	1	0.481036
IQGAP2	1	1	0.481036
ATF7IP2	1	1	0.481036
CRNN	1	1	0.481036
OR5M3	1	1	0.481036
CDCP2	1	1	0.481036
SATB2	1	1	0.481036
AATK	1	1	0.481036
SPDYE4	1	1	0.481036
KIAA0226	1	1	0.481036
INHA	1	1	0.481036
MAP4K2	1	1	0.481036
SPRR2E	1	1	0.481036
PAM	1	1	0.481036
ZC3H12A	1	1	0.481036
OR51A2	1	1	0.481036
FLG	5	9	0.486071
ZNF717	7	22	0.520738
TTN	8	17	0.530343
TTC40	0	3	0.550231
DNAH9	0	3	0.550231
GPR98	0	3	0.550231
LILRA3	0	3	0.550231
FCGBP	0	3	0.550231
SON	0	3	0.550231
PAPLN	0	3	0.550231
RNF213	0	3	0.550231
LPHN3	0	3	0.550231
DYSF	0	3	0.550231
PLXNB1	0	3	0.550231
OBSL1	0	3	0.550231
PRRC2A	0	3	0.550231
MYOM2	0	3	0.550231
CELSR2	0	3	0.550231
UBR4	0	3	0.550231
ALS2CR11	0	3	0.550231
AKAP2	0	3	0.550231
ARHGAP23	0	3	0.550231
TEKT5	0	3	0.550231
ZNF492	0	3	0.550231
ABCC6	0	3	0.550231
HPS6	0	3	0.550231
CTTN	0	3	0.550231
TRPM1	0	3	0.550231
WDR81	0	3	0.550231
ZNF273	0	3	0.550231
UGT2B17	0	3	0.550231
ADAMTSL2	0	3	0.550231
KCNE4	0	3	0.550231
ZNF716	0	3	0.550231
ZNF680	0	3	0.550231
AMBN	0	3	0.550231
NLRP2	0	3	0.550231
TRIM43B	0	3	0.550231
USP10	0	3	0.550231
BPIFB2	0	3	0.550231
STX6	0	3	0.550231
OR2T4	0	3	0.550231
ACTRT3	0	3	0.550231
PXDNL	0	3	0.550231
FCRL5	0	3	0.550231
SMCP	0	3	0.550231
EXOSC9	0	3	0.550231
WDR89	0	3	0.550231
ZNF93	0	3	0.550231
LGALS9C	0	3	0.550231
FSIP2	0	4	0.563861
PCLO	0	4	0.563861
ANKRD30A	0	4	0.563861
CMYA5	0	4	0.563861
MYH7B	0	4	0.563861
ZNF761	0	4	0.563861
CES1	0	4	0.563861
TAS2R19	0	4	0.563861
HLA-DRB1	0	4	0.563861
LRRC37B	0	4	0.563861
ZFYVE26	0	4	0.563861
PPP4R2	0	4	0.563861
DNHD1	2	3	0.606967
KIR3DL2	2	3	0.606967
USP42	2	3	0.606967
ZNF57	2	3	0.606967
OR5L2	2	3	0.606967
EPPK1	1	6	0.654898
HRNR	1	6	0.654898
FAT1	1	6	0.654898
MUC5B	1	6	0.654898
RHD	1	6	0.654898
KANK1	1	6	0.654898
SSPO	3	5	0.666402
MUC16	3	6	0.692063
PKD1	2	8	0.702868
KIR3DL3	2	8	0.702868
HLA-DQB1	2	8	0.702868
ZNF469	2	7	1
KIR2DL4	2	7	1
OBSCN	2	6	1
HLA-DQA1	2	6	1
MDC1	2	5	1
HEATR1	2	5	1
SEC16A	2	4	1
CCDC66	2	4	1
PLIN4	1	5	1
HLA-C	1	5	1
MYH6	1	5	1
PRSS3	1	5	1
GPRC6A	1	5	1
PLAC4	1	5	1
ABCA13	1	4	1
LAMA5	1	4	1
DNAH6	1	4	1
DNAH10	1	4	1
KNDC1	1	4	1
MYBBP1A	1	4	1
SYNE1	1	3	1
SPTBN5	1	3	1
COL18A1	1	3	1
LAMC3	1	3	1
MDN1	1	3	1
MUC4	1	3	1
SSC5D	1	3	1
CEP250	1	3	1
UMODL1	1	3	1
CARD14	1	3	1
TPTE	1	3	1
GPR116	1	3	1
OR10C1	1	3	1
OGFR	1	3	1
KCNJ12	1	3	1
ZNF568	1	3	1
PLEC	1	2	1
DNAH8	1	2	1
DNAH14	1	2	1
IGFN1	1	2	1
EFCAB6	1	2	1
HMCN1	1	2	1
PKDREJ	1	2	1
TENM4	1	2	1
ESPNL	1	2	1
COL7A1	1	2	1
CHD6	1	2	1
MUC7	1	2	1
SRCAP	1	2	1
DMKN	1	2	1
SIGLEC10	1	2	1
CGREF1	1	2	1
CELA3B	1	2	1
OR7C2	1	2	1
TMEM218	1	2	1
TREML2	1	2	1
MAPK10	1	2	1
ARHGEF35	1	2	1
AHNAK	0	2	1
RYR1	0	2	1
CACNA1H	0	2	1
TCHH	0	2	1
USH2A	0	2	1
XIRP2	0	2	1
IGSF10	0	2	1
GPR179	0	2	1
TACC2	0	2	1
C6orf132	0	2	1
BIRC6	0	2	1
CSPG4	0	2	1
LAMA1	0	2	1
TDRD6	0	2	1
DPCR1	0	2	1
MUC2	0	2	1
KIF27	0	2	1
DSP	0	2	1
NFASC	0	2	1
DCHS2	0	2	1
TRIM56	0	2	1
ANKRD36	0	2	1
SPATA18	0	2	1
PRDM2	0	2	1
MYH8	0	2	1
TCEB3B	0	2	1
EVPL	0	2	1
SRRM5	0	2	1
LILRB1	0	2	1
ZNF658	0	2	1
NUMA1	0	2	1
CFH	0	2	1
TNN	0	2	1
GON4L	0	2	1
DBF4	0	2	1
ZNF430	0	2	1
FAT2	0	2	1
PPRC1	0	2	1
MSLN	0	2	1
ANKRD18A	0	2	1
PCDHA9	0	2	1
ZNF783	0	2	1
SPTBN4	0	2	1
PIDD	0	2	1
DCHS1	0	2	1
ULK4	0	2	1
FDXR	0	2	1
ZNF737	0	2	1
ARID1B	0	2	1
KIAA2013	0	2	1
MAST3	0	2	1
DSG1	0	2	1
C6orf170	0	2	1
GCKR	0	2	1
CUBN	0	2	1
PTCH1	0	2	1
ZNF814	0	2	1
SERPINH1	0	2	1
ITPRIPL2	0	2	1
PTCHD2	0	2	1
C9orf84	0	2	1
NRAP	0	2	1
ZNF681	0	2	1
KRTAP5-5	0	2	1
ALOX15B	0	2	1
LTBP1	0	2	1
KIAA1671	0	2	1
MYBPC2	0	2	1
VWA3A	0	2	1
CYP2A13	0	2	1
ZNF90	0	2	1
SNX19	0	2	1
RANBP17	0	2	1
GRIK1	0	2	1
EIF5B	0	2	1
SPOCD1	0	2	1
ZNF709	0	2	1
SBSN	0	2	1
KIAA1239	0	2	1
ZNF98	0	2	1
ZNF844	0	2	1
NMBR	0	2	1
ZNF880	0	2	1
USP35	0	2	1
MADCAM1	0	2	1
PCDHGB4	0	2	1
FKBP9	0	2	1
PKP2	0	2	1
NEFH	0	2	1
ORM2	0	2	1
TMEM44	0	2	1
MYO5C	0	2	1
INTS4	0	2	1
CTAGE4	0	2	1
TRIM48	0	2	1
SLC5A9	0	2	1
KIAA0020	0	2	1
ZNF142	0	2	1
PRDM9	0	2	1
FBXW9	0	2	1
SLC13A4	0	2	1
OSGIN1	0	2	1
OVGP1	0	2	1
SEZ6L	0	2	1
SREBF2	0	2	1
PPFIA1	0	2	1
ZNF649	0	2	1
MRGPRX1	0	2	1
ZNF816	0	2	1
TRIM16L	0	2	1
FCGR1B	0	2	1
FANK1	0	2	1
CCDC91	0	2	1
TGM4	0	2	1
DYNC1I2	0	2	1
CES2	0	2	1
C10orf118	0	2	1
TTL	0	2	1
ASL	0	2	1
C14orf93	0	2	1
OR5R1	0	2	1
LOC728819	0	2	1
CNTNAP3	0	2	1
PDHA2	0	2	1
C5orf60	0	2	1
SNTG1	0	2	1
PEBP4	0	2	1
ATP12A	0	2	1
PRAMEF17	0	2	1
MRC1	0	2	1
MLL2	0	1	1
SORL1	0	1	1
DNAH7	0	1	1
CROCC	0	1	1
ANK3	0	1	1
PIEZO1	0	1	1
TRIOBP	0	1	1
COL12A1	0	1	1
HRC	0	1	1
OR4N4	0	1	1
MPDZ	0	1	1
CCDC88C	0	1	1
TEP1	0	1	1
CACNA1I	0	1	1
VWF	0	1	1
ATM	0	1	1
PCNT	0	1	1
ZFHX3	0	1	1
MYO15A	0	1	1
KALRN	0	1	1
SYTL2	0	1	1
KIAA0586	0	1	1
PDCD11	0	1	1
STAB2	0	1	1
BOD1L1	0	1	1
EXD3	0	1	1
ZNF598	0	1	1
DNAH3	0	1	1
MACF1	0	1	1
LRP2	0	1	1
CCDC168	0	1	1
ALPK3	0	1	1
MYOF	0	1	1
WDFY4	0	1	1
ADAMTSL4	0	1	1
AMOTL2	0	1	1
ADCY10	0	1	1
ASPH	0	1	1
CNTRL	0	1	1
ZNF91	0	1	1
VPS13B	0	1	1
ADCY6	0	1	1
ZNF728	0	1	1
DNAH17	0	1	1
SAMD9	0	1	1
EP400	0	1	1
NOL6	0	1	1
ADAMTS14	0	1	1
ABCA4	0	1	1
FNDC1	0	1	1
SCN4A	0	1	1
SLX4	0	1	1
CCDC157	0	1	1
OR2M7	0	1	1
HIVEP3	0	1	1
VPS13D	0	1	1
RGSL1	0	1	1
ARHGAP21	0	1	1
SIPA1L3	0	1	1
NLRC3	0	1	1
NBAS	0	1	1
MICALL2	0	1	1
RERE	0	1	1
NEFM	0	1	1
FAM214B	0	1	1
LAMB4	0	1	1
NID2	0	1	1
RLN2	0	1	1
LIPE	0	1	1
NOTCH1	0	1	1
CUL9	0	1	1
PITPNM2	0	1	1
PEX6	0	1	1
ZC3H3	0	1	1
C10orf90	0	1	1
RECQL4	0	1	1
FAM205A	0	1	1
GPR125	0	1	1
TLE2	0	1	1
SCN10A	0	1	1
FMN2	0	1	1
KIF16B	0	1	1
SSTR3	0	1	1
ZNF254	0	1	1
BTN2A2	0	1	1
ZNF609	0	1	1
ZNF519	0	1	1
MYCBP2	0	1	1
KIAA0754	0	1	1
HTT	0	1	1
FASN	0	1	1
HERC1	0	1	1
KIF2B	0	1	1
SMG1	0	1	1
ANKRD18B	0	1	1
CES5A	0	1	1
NUP98	0	1	1
FYCO1	0	1	1
FAM186B	0	1	1
TSR1	0	1	1
GLDC	0	1	1
ZNF208	0	1	1
ABCA3	0	1	1
ANKAR	0	1	1
TPTE2	0	1	1
PLEKHG4	0	1	1
ABCC11	0	1	1
ITSN2	0	1	1
NRCAM	0	1	1
DDX60L	0	1	1
SPATA31C1	0	1	1
NBEA	0	1	1
PIEZO2	0	1	1
ARHGAP11A	0	1	1
MYO10	0	1	1
CDH26	0	1	1
GCC2	0	1	1
CASP9	0	1	1
ZZEF1	0	1	1
PCDH15	0	1	1
ZNF678	0	1	1
ABCA9	0	1	1
KIAA0100	0	1	1
FRMD1	0	1	1
ACSM2B	0	1	1
POLR1A	0	1	1
NFATC4	0	1	1
MC1R	0	1	1
BAIAP3	0	1	1
SMYD4	0	1	1
KIAA0430	0	1	1
NOTCH4	0	1	1
ZNF708	0	1	1
TULP4	0	1	1
SLC39A4	0	1	1
ZNF267	0	1	1
SLC24A6	0	1	1
BMS1	0	1	1
MYOM1	0	1	1
UNC13D	0	1	1
PROSER1	0	1	1
TTC31	0	1	1
FRMD4B	0	1	1
SLC22A11	0	1	1
KIAA1549	0	1	1
GIMAP6	0	1	1
PLEKHA7	0	1	1
CBLB	0	1	1
RDH8	0	1	1
RBM42	0	1	1
SPAG5	0	1	1
TICAM1	0	1	1
PHLDB1	0	1	1
MTUS1	0	1	1
ANKK1	0	1	1
ACOT11	0	1	1
OR4C16	0	1	1
EIF4G1	0	1	1
LRP5	0	1	1
HGFAC	0	1	1
MEFV	0	1	1
SOGA2	0	1	1
C1orf87	0	1	1
XKR5	0	1	1
TTLL5	0	1	1
VCAN	0	1	1
HSPA6	0	1	1
PLEKHG3	0	1	1
CASKIN1	0	1	1
C2orf81	0	1	1
CHST15	0	1	1
RBL2	0	1	1
CDHR5	0	1	1
ADAMTS18	0	1	1
TDRD5	0	1	1
CLEC4M	0	1	1
PSG6	0	1	1
RIOK1	0	1	1
GAK	0	1	1
CELSR3	0	1	1
ECT2L	0	1	1
WDR90	0	1	1
ANKHD1	0	1	1
PODN	0	1	1
FLYWCH1	0	1	1
ADRA1D	0	1	1
SPECC1	0	1	1
IGF2R	0	1	1
ACO2	0	1	1
MEGF8	0	1	1
DPY19L2	0	1	1
GLTSCR2	0	1	1
IL16	0	1	1
TMPRSS15	0	1	1
SLC5A4	0	1	1
EMILIN2	0	1	1
TCF20	0	1	1
SLC6A13	0	1	1
LAMB3	0	1	1
SIPA1L1	0	1	1
TLN1	0	1	1
MASP2	0	1	1
OR1L3	0	1	1
IQGAP3	0	1	1
MLL5	0	1	1
ULK1	0	1	1
MCF2L	0	1	1
DIAPH3	0	1	1
EVC	0	1	1
RGL4	0	1	1
LILRB4	0	1	1
USP34	0	1	1
PINX1	0	1	1
TTLL12	0	1	1
PTX4	0	1	1
DNAH1	0	1	1
OAS3	0	1	1
MMP20	0	1	1
DTNBP1	0	1	1
ITGB4	0	1	1
BDP1	0	1	1
OR51A4	0	1	1
MAP2	0	1	1
SLC22A18AS	0	1	1
FAM21C	0	1	1
FAM188B	0	1	1
IQUB	0	1	1
CCDC105	0	1	1
GPR108	0	1	1
NEDD4	0	1	1
C5orf42	0	1	1
MAPK15	0	1	1
DGKZ	0	1	1
LRIT3	0	1	1
AHCTF1	0	1	1
CCDC13	0	1	1
HTR6	0	1	1
ITGB7	0	1	1
PARD3B	0	1	1
ADAM17	0	1	1
AGBL3	0	1	1
BRF2	0	1	1
TCIRG1	0	1	1
CST1	0	1	1
TMEM132C	0	1	1
ZNF735	0	1	1
C22orf42	0	1	1
SOX6	0	1	1
TRIM10	0	1	1
AGL	0	1	1
ADAM29	0	1	1
ASTN1	0	1	1
DGAT1	0	1	1
DLGAP5	0	1	1
SPDYE3	0	1	1
SAMD11	0	1	1
COL15A1	0	1	1
FAM160A2	0	1	1
LRP1B	0	1	1
SNRNP200	0	1	1
VTN	0	1	1
KRTAP10-5	0	1	1
GTF2I	0	1	1
PATL2	0	1	1
TLR5	0	1	1
MAP3K6	0	1	1
IL17RA	0	1	1
RPN1	0	1	1
PHLPP1	0	1	1
SELPLG	0	1	1
PMFBP1	0	1	1
MOCS1	0	1	1
ESYT2	0	1	1
IP6K3	0	1	1
SPTY2D1	0	1	1
TRAF1	0	1	1
NEK9	0	1	1
HIPK4	0	1	1
ADARB2	0	1	1
CFHR5	0	1	1
CEL	0	1	1
PLEKHG2	0	1	1
FAM83E	0	1	1
SERINC4	0	1	1
ATAD2B	0	1	1
ZNF506	0	1	1
PCDHB13	0	1	1
F5	0	1	1
NEDD4L	0	1	1
CCDC85A	0	1	1
HIRIP3	0	1	1
VIPAS39	0	1	1
GPR110	0	1	1
ALPK1	0	1	1
SNX31	0	1	1
MYH9	0	1	1
SPATA31C2	0	1	1
CDHR1	0	1	1
ITGBL1	0	1	1
HOXB9	0	1	1
PHLDB2	0	1	1
ROBO4	0	1	1
GNPTAB	0	1	1
SPTA1	0	1	1
CD300LF	0	1	1
INF2	0	1	1
GNA15	0	1	1
LRRC37A	0	1	1
CDH24	0	1	1
CPS1	0	1	1
SERPINI2	0	1	1
NUF2	0	1	1
TMEM249	0	1	1
ZMYM2	0	1	1
CACNA1D	0	1	1
EPHA8	0	1	1
IMPG2	0	1	1
KRT14	0	1	1
PCDHB2	0	1	1
ATMIN	0	1	1
EPG5	0	1	1
DDX58	0	1	1
NUP62	0	1	1
KIAA1383	0	1	1
TAS1R3	0	1	1
SPATA31D1	0	1	1
SEMG2	0	1	1
TELO2	0	1	1
PYROXD2	0	1	1
DNALI1	0	1	1
GPR78	0	1	1
KSR1	0	1	1
MYH4	0	1	1
ZNF28	0	1	1
PRKRIR	0	1	1
VPS8	0	1	1
URB1	0	1	1
ARID3C	0	1	1
HBS1L	0	1	1
ALS2	0	1	1
BPTF	0	1	1
TP53BP1	0	1	1
NTN3	0	1	1
GK2	0	1	1
KIAA0319	0	1	1
NDNL2	0	1	1
KIF20B	0	1	1
OR13C9	0	1	1
ARHGAP30	0	1	1
HIP1R	0	1	1
ZNF714	0	1	1
TRAP1	0	1	1
KIAA1429	0	1	1
CBS	0	1	1
LRGUK	0	1	1
ABCA7	0	1	1
ALDH1L1	0	1	1
KIAA0556	0	1	1
TRIP12	0	1	1
FBXO44	0	1	1
ZNF181	0	1	1
KRT1	0	1	1
AGER	0	1	1
SERPINA10	0	1	1
PRDM7	0	1	1
NRP2	0	1	1
CCDC81	0	1	1
TMEM134	0	1	1
EPB42	0	1	1
RPL6	0	1	1
GPR124	0	1	1
SUSD1	0	1	1
EVI5	0	1	1
N4BP1	0	1	1
DCBLD2	0	1	1
POU2F1	0	1	1
NPC1	0	1	1
TUBB2B	0	1	1
KRTAP2-1	0	1	1
SIRT2	0	1	1
HAPLN3	0	1	1
OR5AC2	0	1	1
FAM64A	0	1	1
CYFIP1	0	1	1
IL17REL	0	1	1
ARHGEF4	0	1	1
MLLT10	0	1	1
ARHGEF11	0	1	1
UBP1	0	1	1
CAMTA1	0	1	1
EPB41L4A	0	1	1
SLC5A2	0	1	1
ABCB9	0	1	1
CHD2	0	1	1
KCNS1	0	1	1
POC5	0	1	1
DSTYK	0	1	1
TXNDC16	0	1	1
RFX8	0	1	1
STEAP1	0	1	1
TLR10	0	1	1
IL20RA	0	1	1
HNRNPM	0	1	1
CYP2F1	0	1	1
BCAM	0	1	1
FERMT1	0	1	1
PRPF39	0	1	1
MSH3	0	1	1
IFIT3	0	1	1
KIF9	0	1	1
DCAF4L1	0	1	1
GDF15	0	1	1
GNE	0	1	1
SPG11	0	1	1
ADCY5	0	1	1
STK19	0	1	1
ITGA10	0	1	1
SCARB1	0	1	1
TP53BP2	0	1	1
ABLIM1	0	1	1
SHROOM1	0	1	1
LDHAL6B	0	1	1
CPA1	0	1	1
DGKG	0	1	1
GFM2	0	1	1
BRSK1	0	1	1
SCD5	0	1	1
ALDH7A1	0	1	1
THBS1	0	1	1
RHO	0	1	1
UNC13B	0	1	1
ATP1A4	0	1	1
JAKMIP3	0	1	1
DUSP27	0	1	1
RBM34	0	1	1
GPATCH2L	0	1	1
NNT	0	1	1
KIAA1609	0	1	1
METTL21B	0	1	1
MLLT6	0	1	1
NYAP1	0	1	1
VWA5B2	0	1	1
KRTAP1-5	0	1	1
PDXDC1	0	1	1
IPP	0	1	1
BIN2	0	1	1
AGA	0	1	1
S100A4	0	1	1
MUM1	0	1	1
ASCC1	0	1	1
PCDHA10	0	1	1
NCR3LG1	0	1	1
SH3BP4	0	1	1
WDR33	0	1	1
FZD10	0	1	1
PCDHB7	0	1	1
AHDC1	0	1	1
AKNAD1	0	1	1
LOC81691	0	1	1
ZNF500	0	1	1
FOXK2	0	1	1
APOBEC1	0	1	1
CRISP2	0	1	1
ALG3	0	1	1
LIMD1	0	1	1
TTC17	0	1	1
CELF1	0	1	1
FAM149A	0	1	1
ZBED6	0	1	1
PDGFRB	0	1	1
SPICE1	0	1	1
DNAJC6	0	1	1
RFPL2	0	1	1
C16orf82	0	1	1
TMEM254	0	1	1
CPB2	0	1	1
ZNF18	0	1	1
FBLN2	0	1	1
SFTPC	0	1	1
COL27A1	0	1	1
IL1RL1	0	1	1
CRIPAK	0	1	1
SLC10A2	0	1	1
RASA3	0	1	1
SYT12	0	1	1
TRIM7	0	1	1
RESP18	0	1	1
ABCC12	0	1	1
C2	0	1	1
ZNF180	0	1	1
TJAP1	0	1	1
SACM1L	0	1	1
FZD4	0	1	1
CAD	0	1	1
CDHR3	0	1	1
GRIK4	0	1	1
APOBEC3B	0	1	1
CYP4A22	0	1	1
PTK6	0	1	1
KLHDC1	0	1	1
TRIM43	0	1	1
SMPD1	0	1	1
PA2G4	0	1	1
TBC1D10B	0	1	1
VWCE	0	1	1
LRRC37A3	0	1	1
CARKD	0	1	1
THEG	0	1	1
RGPD3	0	1	1
ABL2	0	1	1
ATP13A1	0	1	1
FAM149B1	0	1	1
TCEA2	0	1	1
SLC6A3	0	1	1
MANSC1	0	1	1
SERTAD4	0	1	1
SPAG17	0	1	1
NRIP1	0	1	1
PLRG1	0	1	1
SCUBE1	0	1	1
C21orf2	0	1	1
SCAP	0	1	1
SLC2A1	0	1	1
LDLRAD4	0	1	1
MPEG1	0	1	1
NCKIPSD	0	1	1
OR4C11	0	1	1
MAP1LC3C	0	1	1
CNST	0	1	1
SPPL2C	0	1	1
FN3KRP	0	1	1
AANAT	0	1	1
C2orf66	0	1	1
NSA2	0	1	1
KRTAP10-7	0	1	1
PARP8	0	1	1
SH2B1	0	1	1
MAP4	0	1	1
OR4A16	0	1	1
NR3C1	0	1	1
C22orf29	0	1	1
SLCO2B1	0	1	1
F7	0	1	1
FAM46B	0	1	1
POPDC2	0	1	1
GSS	0	1	1
OVCH2	0	1	1
CCDC8	0	1	1
FAXC	0	1	1
GRIA4	0	1	1
TIGD7	0	1	1
MSANTD1	0	1	1
FCGR3B	0	1	1
LITAF	0	1	1
SMAD4	0	1	1
GPR111	0	1	1
OR2A7	0	1	1
IFNL4	0	1	1
TMEM242	0	1	1
DGKB	0	1	1
SLC26A3	0	1	1
KIAA1328	0	1	1
JMJD1C	0	1	1
ZFPM1	0	1	1
RALY	0	1	1
FAM86C1	0	1	1
COX11	0	1	1
ZNF732	0	1	1
ZBTB12	0	1	1
RBMS1	0	1	1
RNF26	0	1	1
ERBB2	0	1	1
PGA5	0	1	1
SNX17	0	1	1
CHD5	0	1	1
OSCAR	0	1	1
SH3PXD2B	0	1	1
KCNJ10	0	1	1
USP17L7	0	1	1
PANK2	0	1	1
TCERG1	0	1	1
CHI3L2	0	1	1
BMP7	0	1	1
ARID5A	0	1	1
SIGLEC8	0	1	1
HS3ST6	0	1	1
FBXO25	0	1	1
RNF135	0	1	1
FAM107B	0	1	1
SPATA31D4	0	1	1
THRA	0	1	1
THTPA	0	1	1
SEC62	0	1	1
SDAD1	0	1	1
TTLL6	0	1	1
XYLB	0	1	1
VSX1	0	1	1
RIMS1	0	1	1
DSG3	0	1	1
AKTIP	0	1	1
LYAR	0	1	1
CASP4	0	1	1
TRAPPC11	0	1	1
NOMO1	0	1	1
ASB1	0	1	1
SNAP91	0	1	1
C14orf101	0	1	1
PHF2	0	1	1
ZNF585B	0	1	1
DDX24	0	1	1
FBXO43	0	1	1
ZPBP	0	1	1
SHF	0	1	1
ZRANB3	0	1	1
TIRAP	0	1	1
OR3A3	0	1	1
BAZ1B	0	1	1
CBX2	0	1	1
LRRC43	0	1	1
PHACTR3	0	1	1
GGT7	0	1	1
MBD1	0	1	1
NSF	0	1	1
SYS1	0	1	1
ZNF491	0	1	1
CDC14A	0	1	1
RBCK1	0	1	1
C14orf79	0	1	1
APBB2	0	1	1
ELANE	0	1	1
OTUD4	0	1	1
SLC8A2	0	1	1
PDZD3	0	1	1
RRP9	0	1	1
SYCE1	0	1	1
PDE2A	0	1	1
CCL4	0	1	1
SLFN11	0	1	1
KRT6A	0	1	1
PIKFYVE	0	1	1
EGFLAM	0	1	1
CARNS1	0	1	1
CASC5	0	1	1
OR7G1	0	1	1
RANBP3	0	1	1
FFAR1	0	1	1
BCL7B	0	1	1
KCNH2	0	1	1
MRPS28	0	1	1
UQCRFS1	0	1	1
MB21D1	0	1	1
NIPAL2	0	1	1
VDR	0	1	1
SEMA7A	0	1	1
SLC2A10	0	1	1
EPB49	0	1	1
EPHA1	0	1	1
TLK2	0	1	1
SGCE	0	1	1
FCGR1A	0	1	1
RSPH6A	0	1	1
OXCT2	0	1	1
PTCD3	0	1	1
C17orf49	0	1	1
CTCFL	0	1	1
SAP30BP	0	1	1
HEG1	0	1	1
ELL	0	1	1
STX5	0	1	1
SLC15A3	0	1	1
LCE1B	0	1	1
HUS1B	0	1	1
C20orf118	0	1	1
THSD1	0	1	1
SAMD10	0	1	1
ZNF7	0	1	1
POU4F2	0	1	1
DDIT4L	0	1	1
HLA-DRB5	0	1	1
SPECC1L	0	1	1
FAM203A	0	1	1
LGALS9B	0	1	1
PDCD6	0	1	1
DCPS	0	1	1
MRPL4	0	1	1
SGK494	0	1	1
ZNF74	0	1	1
DFNB59	0	1	1
SIGLEC14	0	1	1
CLEC17A	0	1	1
PLEK	0	1	1
Gene is gene symbol.
SC (supercentenarian) and PGP (PGP control) 2+ carriers are the number of individuals in each group with 2 or more rare protein-altering variants in a given gene.
P-value is the nominal P-value derived from the Fisher's Exact statistical test (see methods). None of the genes was significant after Bonferroni correction for multiple testing.
